# Supplementary material
Source: PubMed Central journal article supplement (PMC5260826)
Supplement: NIHMS840219-supplement-2.pdf [file NIHMS840219-supplement-2.pdf]

# Supplementary Figure 1

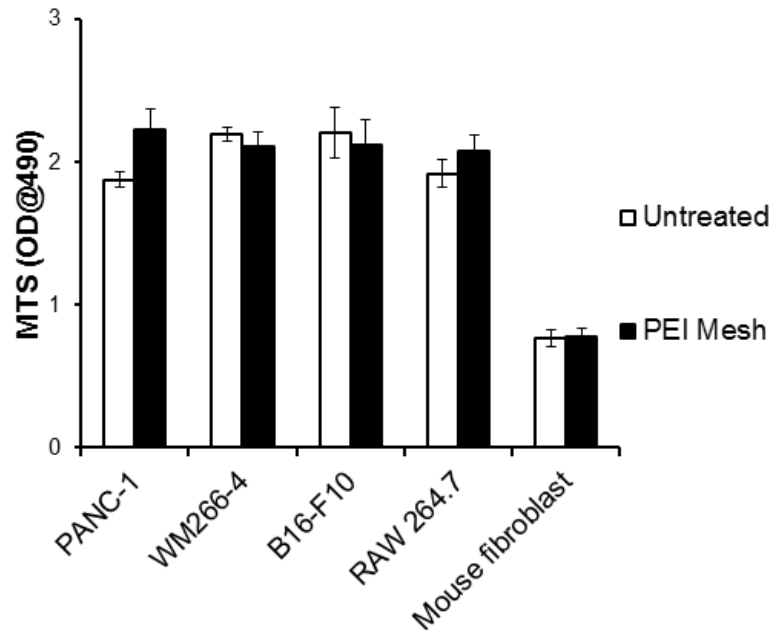

**Supplementary Fig. S1.** Serum-containing complete culture media were pre-incubated for 1 min with PEI-immobilized PSAM/polystyrene microfiber mesh (PEI Mesh). Human pancreatic cancer cell line PANC-1, human melanoma cell line WM266-4, mouse melanoma cell line B16-F10, mouse macrophage cell line RAW264.7 and mouse embryonic fibroblast were cultured for 3 days with either PEI Mesh-treated complete media or untreated complete media. The cell growth was determined using MTS assay.
